# Supplementary material for: Organic–inorganic hybrid Co-containing polyoxotungstate as an oxygen evolution catalyst
Source: Royal Society of Chemistry journal article supplement (doi:10.1039/d4ce00873a), 2024-01-01
Supplement: d4ce00873a1.pdf [file d4ce00873a1.pdf]

# Organic-Inorganic Hybrid Co-Containing Polyoxotungstates as Oxygen Evolution Catalyst

Zhe-Hong Chen,<sup>†</sup> Xiao-Yue Zhang,<sup>†</sup> Da-Huan Li, Xin-Xiong Li, Yan-Qiong Sun, Cai Sun\* and Shou-Tian Zheng\*

Fujian Provincial Key Laboratory of Advanced Inorganic Oxygenated Materials, College of Chemistry, Fuzhou University, Fuzhou, Fujian 350108, China.

China. E-mail: [csun@fzu.edu.cn](mailto:csun@fzu.edu.cn) (C. Sun); [stzheng@fzu.edu.cn](mailto:stzheng@fzu.edu.cn) (S.-T. Zheng).

## Index

|                                                                                                        |    |
|--------------------------------------------------------------------------------------------------------|----|
| <b>Experimental section</b> .....                                                                      | 2  |
| <b>Supplementary Tables</b> .....                                                                      | 4  |
| Table S1. Comparison of OER performances of the electrocatalysts in neutral electrolytes. ....         | 4  |
| Table S2. Crystallographic data for <b>Co-POW</b> and <b>Zn-POW</b> .....                              | 5  |
| Table S3. BVS calculations of all the Co atoms for Co-POW. ....                                        | 6  |
| Table S4. Fitted data of the electrochemical impedance spectroscopy analysis. ....                     | 7  |
| <b>Supplementary Figures</b> .....                                                                     | 8  |
| Fig. S1. Crystal morphology of <b>Co-POW</b> (left) and <b>Zn-POW</b> (right). ....                    | 8  |
| Fig. S2. The simulated and experimented powder XRD patterns for <b>Co-POW</b> and <b>Zn-POW</b> . .... | 8  |
| Fig. S3. IR curves of <b>Co-POW</b> and <b>Zn-POW</b> .....                                            | 9  |
| Fig. S4. TGA curve for <b>Co-POW</b> .....                                                             | 10 |
| Fig. S5. TGA curve for <b>Zn-POW</b> .....                                                             | 10 |
| Fig. S6. UV-Vis absorption spectra of <b>Co-POW</b> and <b>Zn-POW</b> . ....                           | 11 |
| Fig. S7. Comparison of the Electrochemical activity of <b>Co-POW</b> and CC .....                      | 12 |
| Fig. S8. Measurement of $C_{dl}$ . ....                                                                | 13 |
| <b>3. References</b> .....                                                                             | 14 |

## Experimental section

**Materials and measurements.** Except that the  $K_8Na_2[GeW_9O_{34}] \cdot 25H_2O$  precursors were synthesized according to a method reported in the literature, all chemicals used for syntheses were purchased from commercial sources, and no further purifications were conducted before their usages. Infrared (IR) spectra (KBr pellet) was performed on an Opus Vetex 70 FTIR infrared spectrophotometer in the range of  $400-4000\text{ cm}^{-1}$ . Powder X-ray diffraction (PXRD) patterns were recorded on a Rigaku DMAX 2500 diffractometer with  $MoK\alpha$  radiation ( $\lambda = 0.71073\text{ \AA}$ ). Thermogravimetric analysis was conducted using a Mettler Toledo TGA/SDTA 851<sup>e</sup> analyzer in an  $N_2$ -flow atmosphere with a heating rate of  $10\text{ }^\circ\text{C}/\text{min}$  at a temperature of  $25-800\text{ }^\circ\text{C}$ . The UV-vis spectrum was measured on a SHIMADZU UV-2600 UV-visible spectrophotometer. Simulated XRD data was simulated by the Mercury Software with the step of  $0.02^\circ$  from  $5^\circ$  to  $50^\circ$  ( $\lambda = 0.71073\text{ \AA}$ ).

### Synthesis of $H_2K_4[Co(H_2O)_6][Co(bpdo)(H_2O)_5]_2 [Co_4(H_2O)_2(B-\alpha-GeW_9O_{34})_2] \cdot 3bpdo \cdot 16H_2O$ (Co-POW)

A mixture of  $K_8Na_2[GeW_9O_{34}] \cdot 25H_2O$  (0.150 g, 0.049 mmol),  $Co(Ac)_2 \cdot 4H_2O$  (0.045 g, 0.181 mmol), bpdo (0.039 g, 0.207 mmol), were mixed in 5 mL deionized water and 3 mL pH 4.5 buffer solution (HAc/NaAc) in a 20 mL glass bottle. After stirred for 1 hour, the resulting mixture was heated at  $100\text{ }^\circ\text{C}$  for 72 h. After cooling down to room temperature, the resulting solution was filtered and kept at room temperature for slow evaporation, red crystals were obtained. Yield: 20 mg (12.3 %, based on W).

### Synthesis of $H_2K_4[Zn(H_2O)_6][Zn(bpdo)(H_2O)_5]_2 [Zn_4(H_2O)_2(B-\alpha-GeW_9O_{34})_2] \cdot 3bpdo \cdot 16H_2O$ (Zn-POW)

A mixture of  $K_8Na_2[GeW_9O_{34}] \cdot 25H_2O$  (0.150 g, 0.049 mmol),  $ZnCl_2$  (0.035 g, 0.257 mmol), bpdo (0.039 g, 0.207 mmol), were mixed in 5 mL deionized water and 3 mL pH 4.5 buffer solution (HAc/NaAc) in a 20 mL glass bottle. After stirred for 1 hour, the resulting mixture was heated at  $100\text{ }^\circ\text{C}$  for 72 h. After cooling down to room temperature, the resulting solution was filtered and kept at room temperature for slow evaporation, colorless crystals were obtained. Yield: 17 mg (10.5 %, based on W).

**X-ray crystallographic study:** Single-crystal X-ray diffraction measurements were performed on a D8 Quest, using graphite monochromated  $Mo K\alpha$  radiation ( $\lambda = 0.71073\text{ \AA}$ ). Intensity data sets were collected using  $\omega$  scan techniques and corrected for  $Lp$  effects. The structures were solved by the direct method and refined by full-matrix least squares on  $F^2$  using the Siemens SHELXTL<sup>TM</sup> Version 5 package of crystallographic software with anisotropic thermal parameters for all non-hydrogen atoms. Hydrogen atoms were added geometrically and refined using the riding model. Crystal data and structure refinement results for **1** are summarized in Table S2.

The entries of CCDC-2355472 and 2355473 contain the supplementary crystallographic data for **Co-POW** and **Zn-POW**. These data can be obtained free of charge at <http://www.ccdc.cam.ac.uk/conts/retrieving.html> or from the Cambridge Crystallographic Data Centre, 12, Union Road, Cambridge CB2 1EZ, U.K. Fax: (Internet) +44-1223/336-033. E-mail: [depos-it@ccdc.cam.ac.uk](mailto:depos-it@ccdc.cam.ac.uk).

**The preparation of the working electrode.** For the preparation of the working electrode, 5 mg of catalyst was dispersed in a mixed solution containing 120  $\mu\text{L}$  of isopropyl alcohol and 370  $\mu\text{L}$  of 5 vol% aqueous Nafion. Then, the suspension was ultrasonicated for 30 minutes to form a homogeneous ink. The carbon cloth (CC) was first degreased by sonication in acetone and carefully washed with 0.5 M HCl in an ultrasonic bath for 20 min to remove the surface oxidation layer. Finally, apply 60  $\mu\text{L}$  of catalyst ink in a uniform drop onto a CC with an area of  $1 \times 1\text{ cm}^2$  and controlled catalyst loading of  $0.5\text{ mg cm}^{-2}$ .

**Electrochemical OER Measurements:** The electrochemical performance was tested on a three-electrode electrochemical workstation (Zennium-pro, Germany Zahner Instrument) fabricated from a working electrode, a graphite counter electrode, and an Ag/AgCl reference electrode (in 1 M KCl). The test electrolyte is 0.1 M phosphate buffer solution (PBS, pH = 7.4) and normalized concerning the reversible hydrogen electrode (RHE)

according to Equation:  $E_{vs.RHE} = E_{vs.Ag/AgCl} + 0.0591 \times \text{pH} + 0.222 \text{ V}$ . All potentials have been converted to RHE without specific indication. The OER polarization curve was obtained using linear scanning voltammetry at a scan rate of  $5 \text{ mV s}^{-1}$  over a potential range of 1.2 to 2.2 V, and correction of the stable current issue by 91% iR compensation. The contribution of the blank CC electrode to the OER current was negligible (Figure S7). The Tafel slopes were calculated from the linear region of the LSV polarization curve according to the equation:  $\eta = b \times \log j + a$ , in which  $\eta$  is the overpotential,  $b$  is the Tafel slope, and  $j$  is the current density. To evaluate the charge transfer resistance, the EIS was performed at open circuit potential (1.60 V) with an AC voltage amplitude of 5 mV and a frequency of 0.1 Hz to 100 KHz. The electrochemical double-layer capacitance ( $C_{dl}$ ) was estimated by CV scans in a non-Faradic region at various scan rates from 20 to 120  $\text{mV s}^{-1}$ . The  $C_{dl}$  values were estimated by plotting  $\Delta j = (j_a - j_c)$  at 0.975 V against the scan rates. Whereby,  $j_a$  and  $j_c$  are the anode and cathode current densities, respectively. All experiments were performed at room temperature ( $25 \pm 1 \text{ }^\circ\text{C}$ ).

## Supplementary Tables.

**Table S1.** Comparison of OER performances of the electrocatalysts in neutral electrolytes.

| Catalyst                                            | Electrolyte                                      | Overpotential (mV) | Current density (mA cm <sup>-2</sup> ) | Reference |
|-----------------------------------------------------|--------------------------------------------------|--------------------|----------------------------------------|-----------|
| Ultrathin Co <sub>3</sub> S <sub>4</sub> nanosheets | 0.1 M PBS (pH = 7.0)                             | 620                | 3                                      | 3         |
| Co(PO <sub>3</sub> ) <sub>2</sub> nanoparticles     | 0.1 M PBS (pH = 6.4)                             | 590                | 10                                     | 5         |
| Co <sub>3</sub> O <sub>4</sub> nanorods             | 0.1 M Na <sub>2</sub> SO <sub>4</sub> (pH = 7.0) | 606                | 1                                      | 7         |
| bulk Co <sub>3</sub> S <sub>4</sub>                 | 0.1 M PBS (pH = 7.0)                             | 690                | 0.3                                    | 3         |
| Co <sub>3</sub> S <sub>4</sub> / TETA               | 0.1 M PBS (pH = 7.0)                             | 580                | 0.12                                   | 3         |
| CoPi / N-graphene                                   | 0.1 M PBS (pH = 7.0)                             | ~ 200              | 1                                      | 2         |
| Co-Pi nanoarray/Ti                                  | 0.1 M PBS (pH = 7.0)                             | 460                | 10                                     | 4         |
| Co <sub>3</sub> O <sub>4</sub> /SWNTs               | 0.1 M PBS (pH = 7.0)                             | 400                | 1                                      | 6         |
| Co-POM                                              | 0.1 M PBS (pH = 7.4)                             | 515                | 10                                     | This Work |

**Table S2.** Crystallographic data for **Co-POW** and **Zn-POW**.

|                                         | <b>Co-POW</b>                                       | <b>Zn-POW</b>                                     |
|-----------------------------------------|-----------------------------------------------------|---------------------------------------------------|
| Formula                                 | $C_{25}H_{40}Co_{3.5}GeK_2N_5O_{54}W_9$             | $C_{25}H_{40}Zn_{3.5}GeK_2N_5O_{54}W_9$           |
| Mr                                      | 3286.31                                             | 3303.37                                           |
| Crystal size ( $mm^3$ )                 | $0.2 \times 1 \times 1.5$                           | $0.2 \times 1.4 \times 2.4$                       |
| Crystal system                          | Triclinic                                           | Triclinic                                         |
| Space group                             | $P\bar{1}$                                          | $P\bar{1}$                                        |
| $a/\text{\AA}$                          | 11.7657(3)                                          | 11.7109(3)                                        |
| $b/\text{\AA}$                          | 15.6126(3)                                          | 15.5844(6)                                        |
| $c/\text{\AA}$                          | 19.2536(4)                                          | 19.2261(8)                                        |
| $\alpha/^\circ$                         | 67.274(2)                                           | 67.382(4)                                         |
| $\beta/^\circ$                          | 76.636(2)                                           | 76.551(3)                                         |
| $\gamma/^\circ$                         | 87.587(2)                                           | 87.841(2)                                         |
| $V/\text{\AA}^3$                        | 3169.45(13)                                         | 3145.0(2)                                         |
| Z                                       | 2                                                   | 2                                                 |
| $\rho_{calc} \text{ g/cm}^3$            | 3.444                                               | 3.488                                             |
| $\mu/\text{mm}^{-1}$                    | 17.863                                              | 18.413                                            |
| $F(000)$                                | 2975.0                                              | 2993.0                                            |
| Radiation                               | MoK $_{\alpha}$ ( $\lambda = 0.71073$ )             | MoK $_{\alpha}$ ( $\lambda = 0.71073$ )           |
| Reflections collected                   | 32809                                               | 31183                                             |
| Independent reflections                 | 11136 [ $R_{int} = 0.0361$ , $R_{sigma} = 0.0445$ ] | 11072 [ $R_{int} = 0.0614$ , $R_{sigma} = 0.06$ ] |
| Data/restraints/parameters              | 11136/78/984                                        | 11072/169/930                                     |
| GOF on $F^2$                            | 1.064                                               | 1.070                                             |
| Final R indexes [ $I \geq 2\sigma(I)$ ] | $R_1 = 0.0526$ , $wR_2 = 0.1436$                    | $R_1 = 0.0620$ , $wR_2 = 0.1792$                  |
| Final R indexes [all data]              | $R_1 = 0.0744$ , $wR_2 = 0.1605$                    | $R_1 = 0.0875$ , $wR_2 = 0.2039$                  |
| Data completeness                       | 0.958                                               | 0.958                                             |

$$R_1^a = \sum ||F_o| - |F_c|| / \sum |F_o|. \quad wR_2 = [\sum w(F_o^2 - F_c^2)^2 / \sum w(F_o^2)^2]^{1/2}$$

**Table S3.** BVS calculations of all the Co atoms for **Co-POW**.

| Atoms | Calcd for Co <sup>II</sup> | Oxidation state  |
|-------|----------------------------|------------------|
| Co1   | 2.11                       | Co <sup>II</sup> |
| Co2   | 2.09                       | Co <sup>II</sup> |
| Co3   | 2.03                       | Co <sup>II</sup> |
| Co4   | 2.21                       | Co <sup>II</sup> |

**Table S4.** Fitted data of the electrochemical impedance spectroscopy analysis.

| samples       | $R_0/\Omega$ | $CPE_1/mF$ | $R_1/\Omega$ | $CPE_2/\mu F$ | $R_2/\Omega$ | Overall Error |
|---------------|--------------|------------|--------------|---------------|--------------|---------------|
| <b>Zn-POW</b> | 1.05         | 20.1       | 22.5         | 68.3          | 1.02         | 0.47%         |
| <b>Co-POW</b> | 1.12         | 7.09       | 75.2         | 17.1          | 1.24         | 0.83%         |

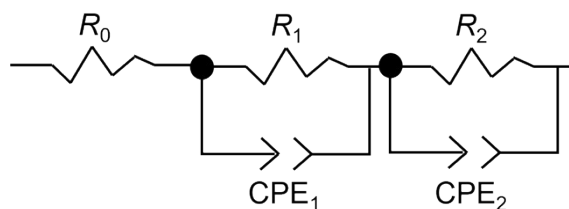

The equivalent circuit is used in fitting the plot.

$R_0$ : solution resistance;  $R_1$  or  $R_2$ : charge transfer resistance;  $CPE_1$  or  $CPE_2$ : constant phase element. The two  $R$ - $CPE$  units represent two electron transfer processes. One is the electrochemical oxidation of  $H_2O$  by electron transfer at the liquid-solid interface. The other is the transfer of electrons to a carbon cloth electrode via a catalyst. The former was a more sluggish process than the latter. Therefore, a larger charge transfer resistance ( $R_1$ ) corresponds to the electrochemical charge transfer process.

## Supplementary Figures.

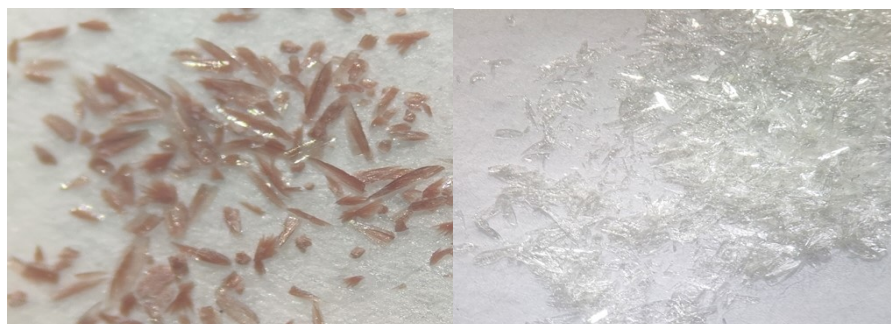

**Fig. S1.** Crystal morphology of **Co-POW** (left) and **Zn-POW** (right).

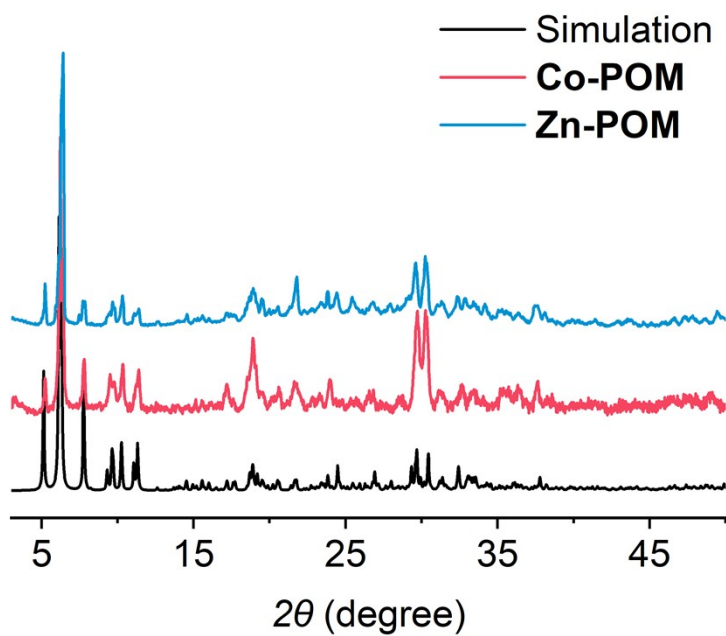

**Fig. S2.** The simulated and experimented powder XRD patterns for **Co-POW** and **Zn-POW**.



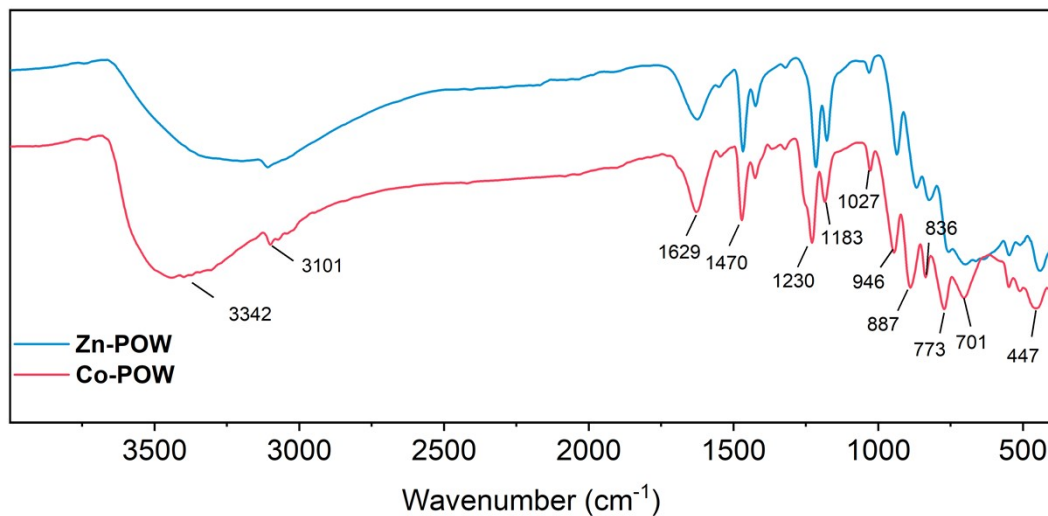

**Fig. S3.** IR curves of **Co-POW** and **Zn-POW**.

The IR spectrum of **Zn-POW** is similar to **Co-POW**. Peaks at 3101 cm<sup>-1</sup> ascribe to the  $\nu(\text{=C-H})$ ; peaks at 1629, 1470 cm<sup>-1</sup> ascribe to the  $\nu(\text{pyridine skeleton})$ ; peaks at positions 1350-1100 cm<sup>-1</sup> mainly ascribe to the  $\nu(\text{C-N})$ ; the peaks below 1000 cm<sup>-1</sup> mainly ascribe to the  $\nu(\text{W-O})$ , and partly  $\delta(\text{=C-H})$ ; the peak at 3342 cm<sup>-1</sup> derived from  $\nu(\text{O-H})$  of H<sub>2</sub>O.

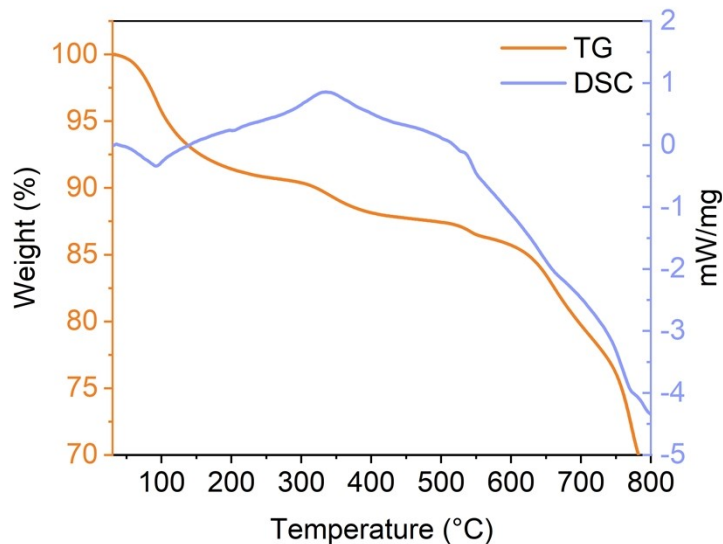

**Fig. S4.** TGA curve for **Co-POW**.

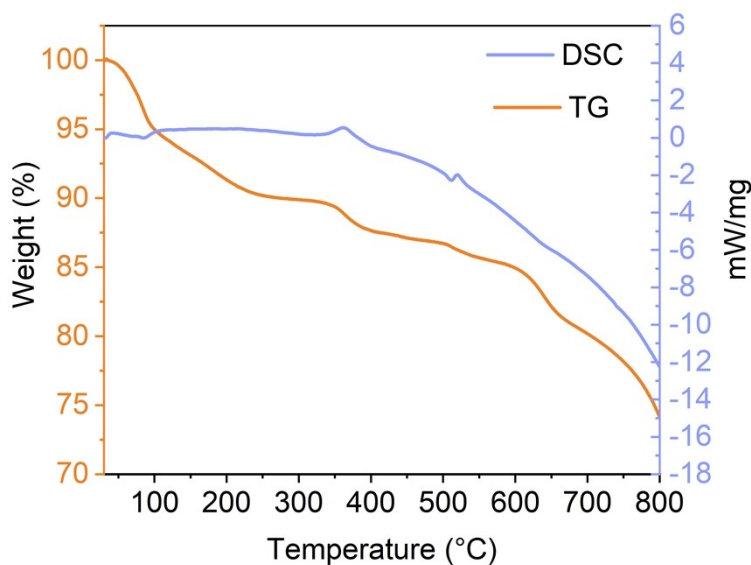

**Fig. S5.** TGA curve for **Zn-POW**.

The thermogravimetric curve of **Co-POW** was measured at a heating rate of 10 °C/min in a N<sub>2</sub>-flow atmosphere, and the temperature range of the test was from 25 °C to 800 °C. The TGA curve of **Co-POW** is similar with the one of **Zn-POW**. As shown in Fig.S4, **Co-POW** has a continuous weight loss process in the temperature range of 25 °C to 800 °C. The first weight-loss stage within the range of 25 °C to 220 °C mainly ascribed to the loss of water molecules. Based on the first weight-loss of about 9.3 % for **Co-POW**, there are about 34 water molecules.

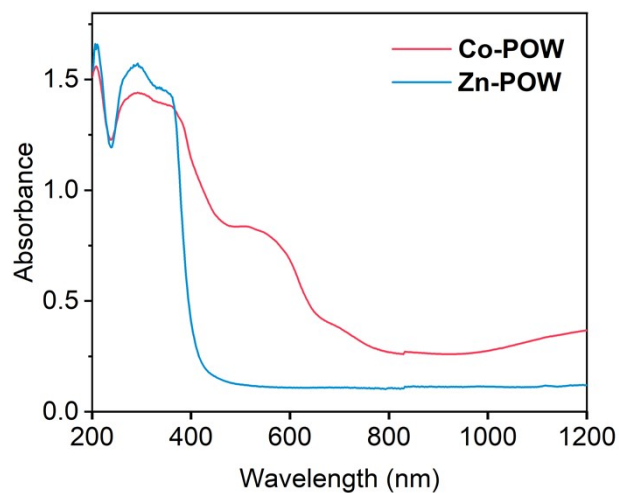

**Fig. S6.** UV-Vis absorption spectra of **Co-POW** and **Zn-POW**.

The UV-Vis absorption spectra of compounds are determined in the range of 200 to 1200 nm. The absorption peak in the range of 200 to 400 nm can be attributed to the charge transfer transitions from O to W. The broad absorption peak in the range of 400 to 600 nm can be attributed to the d-d transition of the 3d transition metal  $\text{Co}^{\text{II}}$ .

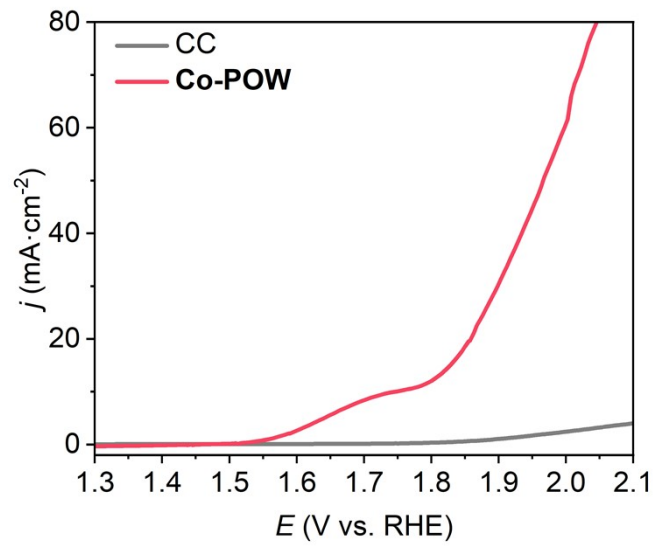

**Fig. S7.** Comparison of the Electrochemical activity of **Co-POW** and CC.

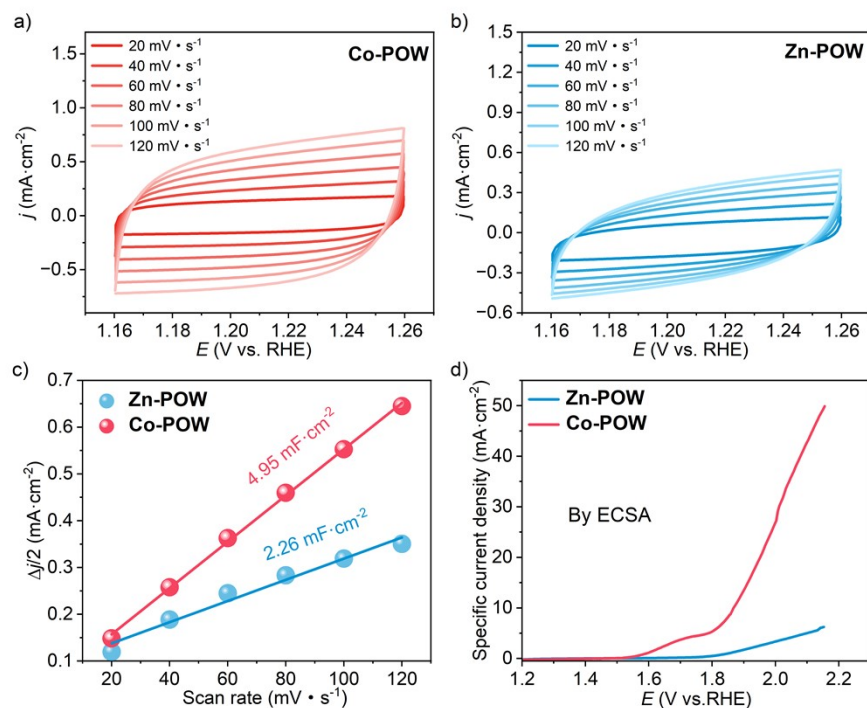

**Fig. S8.** Measurement of  $C_{dl}$ .

CV cycles for **Co-POW** (a) and **Zn-POW** (b) at different scan rates increasing from 20 to 120  $\text{mV} \cdot \text{s}^{-1}$ . (c)  $C_{dl}$  of catalysts derived from current density versus the scan rate. With the measurement of the electrochemical double layer capacitance ( $C_{dl}$ ) of the prepared electrocatalysts, the electrochemically active surface area (ECSA) of the samples was further estimated. As expected, the **Co-POW** catalyst possesses more available active sites with a  $C_{dl}$  value of  $4.95 \text{ mF} \cdot \text{cm}^{-2}$ , which is higher than those of **Zn-POW** ( $2.26 \text{ mF} \cdot \text{cm}^{-2}$ ). To eliminate the impact of different mass loadings of the catalyst on the carbon cloth surface, the current density was normalized against the electrochemical active surface area (ECSA) (Fig. S7d). This also shows that **Co-POW** has relatively higher intrinsic oxygen evolution reaction activity compared to **Zn-POW**, which is in agreement with the above data.

### 3. References

1. G. M. Sheldrick, *Acta Cryst.*, **2008**, *A64*, 112-122.
2. A. Vasileff, S. Chen and S. Z. Qiao, *Nanoscale Horiz*, **2016**, *1*, 41–44.
3. Y. Liu, C. Xiao, M. Lyu, Y. Lin, W. Cai, P. Huang, W. Tong, Y. Zou and Y. Xie, *Angew Chem Int Ed.*, **2015**, *54*, 11231–11235.
4. L. Cui, D. Liu, S. Hao, F. Qu, G. Du, J. Liu, A. M. Asiri and X. Sun, *Nanoscale*. **2017**, *9*, 3752–3756.
5. HS. Ahn and TD. Tilley, *Adv Funct Mater*. **2013**, *23*, 227–233.
6. J. Wu, Y. Xue, X. Yan, W. Yan, Q. Cheng and Y. Xie, *Nano Res*. **2012**, *5*, 521–530.
